# Supplementary material for: The Interplay between Transcriptional Factors and MicroRNAs as an Important Factor for Th17/Treg Balance in RA Patients
Source: MDPI journal article supplement (doi:10.3390/ijms21197169), 2020-09-28
Supplement: s1 [file s1]

## Supplementary Materials

**Table S1.** Arrangement of selected microRNA in Treg and Th17 cells by diseases.

| microRNA        | Tested group | Treg median (min-max)     | Th17 median (min-max)     |
|-----------------|--------------|---------------------------|---------------------------|
| <b>miR-24</b>   | HC           | 0.07006 (0.00135-0.9564)  | 0.23353 (0.02853-2.23042) |
|                 | OA           | 0.0958 (0-0.36172)        | 0.12952 (0-4.17253)       |
|                 | RA           | 0.071295 (0-0.5258)       | 0.098375 (0-0.34621)      |
| <b>miR-26</b>   | HC           | 0.098375 (0-0.34621)      | 0.06065 (0-0.20102)       |
|                 | OA           | 0.02317 (0-0.11434)       | 0.00537 (0-0.27039)       |
|                 | RA           | 0.0053 (0-0.03223)        | 0.00888 (0-0.02425)       |
| <b>miR-31</b>   | HC           | 0.00325 (0-0.02934)       | 0.00717 (0.00041-0.04177) |
|                 | OA           | 0.00173 (0-0.02182)       | 0.00218 (0-0.05018)       |
|                 | RA           | 0.002835 (0-0.02569)      | 0.00465 (0-0.02042)       |
| <b>miR-146a</b> | HC           | 0.36432 (0-2.13913)       | 0.08194 (0.0004-0.62698)  |
|                 | OA           | 0.32016 (0-3.18028)       | 0.075705 (0-5.3329)       |
|                 | RA           | 0.27785 (0-3.63632)       | 0.04206 (0.00299-0.19654) |
| <b>miR-155</b>  | HC           | 0.04713 (0.02211-0.79684) | 0.06181(0.00995-1.48942)  |
|                 | OA           | 0.05155 (0-0.39726)       | 0.01634 (0.00175-0.44475) |
|                 | RA           | 0.02911(0-0.13222)        | 0.02271(0-0.06607)        |

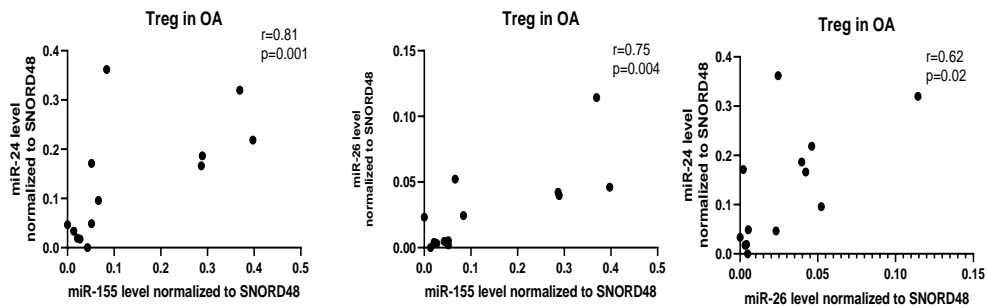

**Fig. S1.** Correlation between microRNAs in Treg cells in OA patients.

**Table S2.** Correlations between microRNAs in Th17 cells in OA patients.

| microRNA | corellated<br>microRNA | correlation<br>coefficient | p value |
|----------|------------------------|----------------------------|---------|
| miR-24   | miR-146a               | 0.70                       | 0.0006  |
| miR-26   | miR-146a               | 0.83                       | <0.0001 |
| miR-26   | miR-155                | 0.89                       | <0.0001 |
| miR-31   | miR-155                | 0.70                       | 0.007   |
| miR-146a | miR-155                | 0.73                       | 0.004   |

**Table S3.** The cut-off points for expression levels of miR-26 and miR-155 in RA and OA patients and healthy subjects (HCs) with the determination of the level of sensitivity and specificity.

| microRNA | Group    | Cells | Cutoff<br>value | Sensitivity %<br>(95% CI) | Specificity % (95%<br>CI) | LRT   |
|----------|----------|-------|-----------------|---------------------------|---------------------------|-------|
| miR-26   | RA vs HC | Th17  | 0.022           | 93.33 (70.18-99.66)       | 53.85 (29.14-76.79)       | 2.02  |
|          |          | Treg  | 0.025           | 84.62 (57.77-97.27)       | 92.86 (68.53-99.63)       | 11.85 |
|          | OA vs HC | Th17  | 0.020           | 76.92 (49.74-91.82)       | 61.54 (35.52-82.29)       | 2.00  |
|          |          | Treg  | 0.051           | 84.62 (57.77-97.27)       | 78.57 (52.41-92.43)       | 3.90  |
| mir-155  | RA vs HC | Th17  | 0.046           | 80 (54.81-92.95)          | 61.54 (35.52-82.29)       | 2.08  |
|          |          | Treg  | 0.118           | 92.31 (66.69-99.61)       | 30.77 (12.68-57.63)       | 1.33  |
|          | OA vs HC | Th17  | 0.070           | 83.33 (55.20-97.04)       | 46.16 (23.21-70.86)       | 1.55  |
|          |          | Treg  | 0.075           | 61.54 (35.52-82.29)       | 30.77 (12.68-57.63)       | 0.88  |

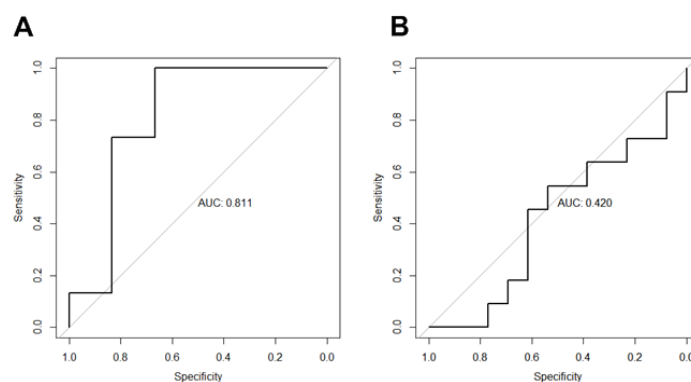

**Fig. S2.** ROC analysis. A- ROC analysis of the combination of miR-26 and miR-155 in Th17 RA vs HCs, B- ROC analysis for miR-146a in Treg OA vs HCs.

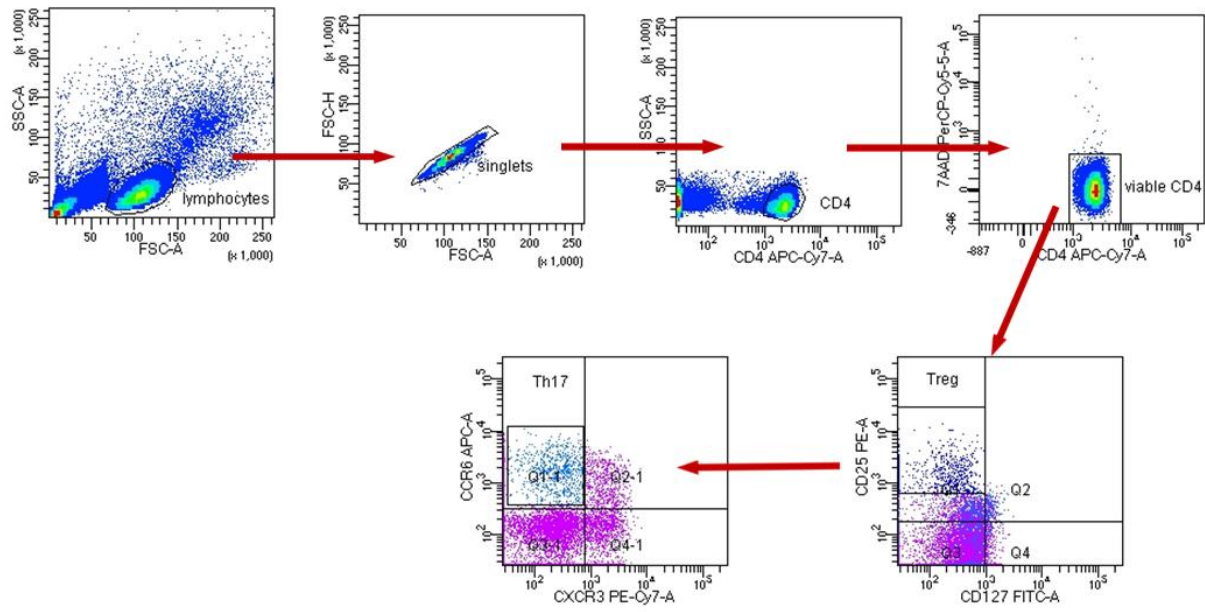

**Figure S3.** Representative gating strategy for FACS of PBMC, showing Treg and Th17 lymphocyte.
